1  
2  
3  
4  
5  
6  
7  
8  
9  
10  
11  
12  
13  
14  
15  
16  
17  
18  
19  
20

**Health-seeking behaviour and beliefs around sore throat in The Gambia: a qualitative study**

**Authors:** Maria Suau Sans<sup>1,2,3\*</sup>, Muhammed Manneh<sup>2</sup>, Isatou Ceesay<sup>2</sup>, Amat Bittaye<sup>2</sup>, Gabrielle de Crombrughe<sup>2</sup>, Alexander J Keeley<sup>2,3,4</sup>, Thushan I. de Silva<sup>3,4</sup>, Jennifer Palmer<sup>1</sup>, Edwin P. Armitage<sup>2</sup>, Michael Marks<sup>3</sup>, on behalf of the MRCG Strep A Study Group<sup>†</sup>.

**Affiliations:**

<sup>1</sup> Department of Disease Control, London School of Hygiene and Tropical Medicine.

<sup>2</sup> The Medical Research Council Unit The Gambia at the London School of Hygiene and Tropical Medicine

<sup>3</sup> Clinical Research Department, London School of Hygiene and Tropical Medicine, UK

<sup>4</sup> Department of Infection, Immunity and Cardiovascular Disease, University of Sheffield.

\*Corresponding author: [Maria.Suau-Sans1@alumni.lshtm.ac.uk](mailto:Maria.Suau-Sans1@alumni.lshtm.ac.uk)

<sup>†</sup>Membership of the MRCG Strep A Study Group is provided in the acknowledgements

**NOTE: This preprint reports new research that has not been certified by peer review and should not be used to guide clinical practice.**

## 21 **Abstract**

22 Group A *Streptococcus* (StrepA) bacteria causes a broad spectrum of diseases. The most  
23 common manifestations of StrepA infection are sore throat and pus-producing skin infections  
24 such as impetigo. Complications of StrepA infection lead to inflammation in the bones,  
25 muscles, joints, and internal organs causing acute rheumatic fever and rheumatic heart disease  
26 (RHD). In The Gambia, the RHD burden is thought to be very high. However, epidemiological  
27 data is minimal, and StrepA control programmes do not exist. This study aims to explore  
28 common beliefs and practices related to sore throats among primary caregivers of children, and  
29 healthcare providers in a community with a high StrepA disease burden. This will inform the  
30 design of preventative strategies for StrepA-related sequelae.

31 Four informal conversations with providers and fifteen semi-structured interviews with  
32 caregivers were conducted in the peri-urban area of Sukuta, The Gambia. Sampling was  
33 purposive and gradual, beginning from households identified to have recently experienced sore  
34 throat through a parallel cohort study. Themes explored in qualitative analysis included: sore  
35 throat causal attributions and diagnoses, care practises, health-seeking behaviour, and  
36 perceived barriers to using the biomedical sector.

37 Sore throats were typically perceived to affect one child in a family, disproportionately or  
38 exclusively. Sore throats are rarely perceived as life-threatening, and awareness of links  
39 between sore throat and ARF or RHD was not reported among caregivers or providers in this  
40 study population. Most cases of sore throat are initially managed at home using traditional  
41 medicine which delays resort to antibiotics, though in two instances of severe pain with the  
42 presence of exudate, fear that the child's life was at risk prompted care-seeking through the  
43 formal health system.

44 Our findings can inform the development of tailored strategies to increase community  
45 knowledge of the potential long-term consequences of sore throats and appropriate care-  
46 seeking, alongside improvements in the health system, to prevent StrepA sequelae effectively.

## 47 **Background**

48 Infection with Group A *Streptococcus* (StrepA, *S. pyogenes*) bacteria causes a broad spectrum  
49 of diseases, with the most common manifestations being sore throat and impetigo (red, pus-  
50 filled sores around the nose, mouth, hand and feet).<sup>1,2,3</sup> Its transmission has been traditionally  
51 attributed to large respiratory droplets, but is yet not fully understood.<sup>4</sup> StrepA infection also  
52 results in more severe complications such as acute rheumatic fever (ARF) and rheumatic heart  
53 disease (RHD), the latter being the leading cause of cardiac-related disease among people under  
54 age 25 worldwide.<sup>5,6,7</sup> ARF occurs because of cross-reactivity between similar antigens found  
55 in the pathogen and the human host, primarily found in the heart and the brain.<sup>8</sup> This can afflict  
56 multiple tissues and result in signs and symptoms such as polyarthritis (joint pain), erythema  
57 marginatum (pink rings on the torso and inner surfaces of the limbs), or Sydenham’s chorea  
58 (neurological disorder that causes uncontrolled movements mostly affecting hands, face and  
59 feet).<sup>9,10</sup> Single or repeated episodes of ARF can cause permanent damage in the heart valves,  
60 leading to RHD.<sup>11</sup>

61 Globally, StrepA is estimated to be responsible for 18.1 million prevalent cases of severe  
62 disease.<sup>12</sup> RHD alone is estimated to be responsible for 10.7 million Disability Adjusted Life-  
63 Years and 306,000 deaths annually.<sup>13</sup> Sub-Saharan Africa has one of the highest RHD age-  
64 standardized prevalence and death rates worldwide, especially in urban areas.<sup>6,14</sup> Yet, StrepA  
65 infections are treatable with widely available, inexpensive antibiotics, making RHD a  
66 premature and preventable cause of death.<sup>15</sup> Explanations are required as to why RHD remains  
67 such a problem in Sub-Saharan Africa.

68 In The Gambia, many children present to hospital with RHD.<sup>16</sup> However, no high-quality  
69 epidemiological data regarding the prevalence and incidence of StrepA infection are available.  
70 One study found that 53.2% of the RHD patients reported a history of recurrent sore throat but  
71 of those only 32.2% had attended a health facility, with most reporting to have used traditional  
72 medicine (TM) or nothing.<sup>16</sup> In high-RHD settings such as The Gambia, many StrepA sore  
73 throats go undiagnosed and untreated. Reasons are likely to be complex involving barriers to  
74 healthcare access, perceptions of the risks and benefits of treatments and cultural  
75 understandings and norms. As children and teenagers are primarily affected by StrepA and its  
76 sequelae, a better understanding of the care seeking behaviour of caregivers of children with  
77 sore throat in such settings is therefore vital. Only two qualitative studies have been conducted  
78 on these topics (both in Uganda). They found that popular perceptions of the causes and best  
79 ways to treat sore throat varied widely from biomedical theories, and TM use was common.<sup>17,18</sup>  
80 However, results from other studies cannot be extrapolated to inform tailored context-specific  
81 prevention strategies in The Gambia. To fill this research gap and to inform the design of  
82 preventative strategies for StrepA-related sequelae, we conducted a qualitative study involving  
83 informal conversations and in-depth interviews in Sukuta, The Gambia.

## 84 **Materials and methods**

### 85 **Study design and procedures**

86 We conducted a qualitative study using semi-structured in-depth interviews to explore beliefs  
87 and practices around sore throat diagnosis, care-seeking, and causes in children among  
88 Gambian caregivers and health professionals. Interviews explored understanding of sore  
89 throat causation, transmission, severity, and usual health-seeking patterns when children  
90 show signs of sore throat. The study was embedded within The Streptococcus Pyogenes  
91 Carriage Acquisition and Transmission prospective cohort study (SpyCATS -  
92 NCT05117528).

### 93 **Study setting**

94 The study was carried out in the peri-urban area of Sukuta, in The Gambia which had a  
95 population of 47,048 and an average household size of 8.1 at the census in 2013.<sup>19</sup> The main  
96 ethnic groups are Mandinka, Fula and Wolof, however, there are other minority groups. The  
97 most spoken languages are Mandinka and Wolof.

### 98 **Research team**

99 MSS conducted the semi-structured interviews and informal conversations. Three clinical  
100 research nurses (AB, IC, and MM) with prior experience in qualitative research, assisted the  
101 primary facilitator when translations from English to Mandinka (IC, MM) or Wolof (IC, AB)  
102 were required, and vice-versa. The nurses lived and worked in Sukuta and were fluent in the  
103 local languages and English.

## 104 **Participant selection**

105 A theoretical sampling approach was followed. Informants were purposefully and gradually  
106 selected based on emerging findings. Nurses and fieldworkers were identified as gatekeepers  
107 to the Sukuta community, knowledgeable regarding the pluralistic medical context, and  
108 informal conversations started. They were able to support identifying 13 households where  
109 children had been ‘recently’ (around six months before the study) affected by sore throats from  
110 the periodical visits they had to conduct as part of the cohort study. Informants from these  
111 interviews referred us to 2 other households they knew of not enrolled in the cohort (15  
112 households in total), as well as a traditional healer and a drug shop vendor who were involved  
113 in treating the sore throat.

114 Adults of all ethnic groups and socioeconomic backgrounds were eligible. Interviewed  
115 individuals were adult (18 and over years old) caregivers, resident in Sukuta during the time of  
116 the fieldwork who had identified, experienced, or heard about an episode of sore throat in a  
117 household.

## 118 **Interviews with households**

119 Participants were interviewed by members of the study team in English, Mandinka, Wolof or  
120 Fula as appropriate. Interviews were audio-recorded and transcribed *verbatim*. All interviews  
121 were conducted in a quiet private area, elected by the participants, and lasted between 20 and  
122 40 minutes. The semi-structured interview guideline included sections on socio-demographics,  
123 health-seeking behaviour in response to the most recent sore throat episode, health beliefs  
124 around sore throats, triggers and barriers to care-seeking and treatment, and knowledge of ARF  
125 and RHD (S1 Appendix). The first two interviews were used to validate the guideline, which  
126 was then adjusted, and some questions reworded.

## 127 **Informal conversations and observations with providers**

128 In addition to semi-structured interviews, non-audio recorded informal conversations were held  
129 opportunistically with three SpyCATS study nurses or fieldworkers and the pharmacy worker.  
130 The conversation with the healer was audio-recorded. Ethnographic observations were  
131 collected during routine procedures and visits to the pharmacy, traditional healer, and a  
132 herbalist stand in the Sandika herbs section of the Serrekunda Market. Notes were taken during  
133 the observations and the informal conversations, and aimed to generate hypotheses,  
134 complement the content of the interviews, and support the analysis process.

## 135 **Data management and analysis**

136 Sociodemographic characteristics of the participants included in this study are shown in Table  
137 1.

138 **Table 1.** Sociodemographic characteristics of participants at enrolment.

|                                       | Household interviews | Provider conversations |
|---------------------------------------|----------------------|------------------------|
| <b>Sex</b>                            |                      |                        |
| Male                                  | 3                    | 4                      |
| Female                                | 11                   | 1                      |
| <b>Age of participants</b>            |                      |                        |
| 18-24 years old                       | 4                    | -                      |
| 25-50 years old                       | 4                    | 3                      |
| >50 years old                         | 6                    | 2                      |
| <b>Occupation*</b>                    |                      |                        |
| Constructor                           | 1                    | -                      |
| Housewife                             | 3                    | -                      |
| Cleaner                               | 2                    | -                      |
| Teacher                               | 1                    | -                      |
| Hairdresser                           | 1                    | -                      |
| Farmer                                | 2                    | -                      |
| Fieldworker                           | -                    | 1                      |
| Pharmacist                            | -                    | 1                      |
| Nurse                                 | -                    | 2                      |
| <i>Marabout</i>                       | -                    | 1                      |
| Student                               | 1                    | -                      |
| Unemployed                            | 2                    | -                      |
| <b>Relationship with the children</b> |                      |                        |

|                                          |   |   |
|------------------------------------------|---|---|
| Mother                                   | 7 | - |
| Father                                   | 4 | 1 |
| Older sister                             | 4 | - |
| Other                                    | - | 3 |
| <b>Tribal affiliation</b>                |   |   |
| Mandinka                                 | 9 | 3 |
| Bambara                                  | 4 | - |
| Wolof                                    | 1 | 1 |
| Serer                                    | 1 | - |
| <b>Interview language</b>                |   |   |
| English                                  | 7 | 4 |
| Mandinka                                 | 7 | - |
| Wolof                                    | 1 | - |
| <b>Last level of education completed</b> |   |   |
| Grade 6                                  | 4 | - |
| Grade 8                                  | 3 | - |
| Grade 9                                  | 5 | - |
| Grade 12                                 | 1 | - |
| College                                  | 1 | 4 |
| Islamic school                           | 1 | - |

---

\*One missing value

139

140 The analysis combined inductive (open coding) and deductive coding (based on themes  
 141 previously identified during the interview guideline design stage and review of relevant  
 142 literature) approaches. Open, axial (finding connections between codes) and selective (core  
 143 category connects multiple codes) coding procedures were used.

144 Thematic saturation was defined as when new incoming data produced little to no new  
 145 information on the topic under exploration.<sup>20</sup> For some themes, saturation was reached after  
 146 eight interviews, and for all but the “societal change” domain, saturation was noticed after 14  
 147 interviews. The final matrix included 37 themes grouped into three great domains.

148

149 Data from the caregivers and traditional healer was analysed separately from the biomedical  
 150 care providers and presented alongside one another in the sections below, being mindful that  
 151 there is not always a clear distinction between 'biomedical' and 'lay' knowledge about diseases.



152 Illustrative quotes were included in the results section to exemplify and justify relevant themes,  
153 with viewpoints clearly labelled. To improve clarity and readability, minor grammatical  
154 changes were applied to some quotes in this report.

## 155 **Ethics and Consent**

156 This study was approved by the joint MRC-Gambia and Ministry of Health Ethics Committee  
157 and the and the London School of Hygiene and Tropical Medicine Ethics Committee. Written  
158 informed consent was obtained from study participants (S2 Appendix). This study follows the  
159 COnsolidated criteria for REporting Qualitative research (COREQ).<sup>21</sup> A completed version of  
160 the COREQ checklist is included in the supplementary material of this publication (S1 Table).

## 161 **Results**

162 The three greater thematic domains have been used to structure the report's findings.

### 163 **Conceptualization of sore throats and its consequences**

164 The local terms *kankonoto dimo* (Mandinka) and *bat bumeti* (Wolof) corresponded to “*throat*  
165 *that is in pain*”. No local language terms were identified to refer to ARF or RHD. The words  
166 *balakando* in Mandinka or *yarambutouga* in Wolof, which correspond to fever (“hot body”),  
167 were used together with other symptom descriptions characteristic of ARF, such as joint pain,  
168 to ask participants if they had ever known anyone suffering from it or heard about the condition.  
169 The Mandinka local term *yusukusasa*, meaning cardio pathology (“heart sickness”), was used  
170 with a description of other symptoms such as joint pain to ask whether participants had heard  
171 about the RHD or known anyone who had suffered it. The English terms were also used in case  
172 they heard about the medical term.

## 173 Case identification

174 Participants described sore throat as pain inside the throat that has a negative impact on eating  
175 and drinking, and sometimes swallowing saliva. Caregivers reported noticing sore throat  
176 episodes in children after they manifested their experience of pain through verbal complaints,  
177 sometimes involving crying. Some participants also described confirming the sore throat in a  
178 child upon observation of tonsillar exudates (referred to as the presence of “something white”  
179 inside the throat), or observation of lymphadenitis (“neck swallow” or “swollen glands”),  
180 which can be experienced before or simultaneously with fever (“hot body”), tiredness or otitis  
181 (“ear pain”) that initiates from the throat and “arrives” up to the ears:

182 *“I see from her she can’t swallow, she feels tired, you know, she cried like ‘I*  
183 *cannot swallow, my neck is paining me’”* (P008, mother).

184 Sore throat susceptibility was not perceived to be ubiquitously distributed, with a few  
185 participants stating that “children never get it” (generally referring to babies or young children  
186 who cannot speak) or something that only certain children get. Participants from many  
187 households identified one child in the family as the sole susceptible individual, reporting single  
188 or multiple (between one and four) sore throat episodes a year:

189 *“Just I have only one girl who got sore throat problem, because my*  
190 *[other] children do not complain about sore throat. But her, only to*  
191 *her, sore throat, every year, two or three times”* (P003, father).

192 If caregivers identified more than one child as being susceptible to experiencing sore throat,  
193 discussions about causality and care-seeking tended to focus on the child reporting multiple  
194 episodes.

## 195 **Perceived consequences and risks**

196 Many participants reported being concerned about sore throat episodes in children. The most  
197 commonly emerging reason for concern was the inability to eat or drink. Unproductivity (“just  
198 lie down”), lymphadenitis, weight loss, difficulty speaking, and missing school due to sore  
199 throat, were also reported reasons for concern. Death as a perceived potential outcome of sore  
200 throat was reported twice and linked with not seeking appropriate healthcare in a health facility  
201 (“get medicines”).

202 *“If you don’t remove it [the exudate] so that thing would come out, it*  
203 *can kill someone.”* (P013, older sister).

204 Participants who reported no concern or very mild concern classified the sore throat episodes  
205 as “normal” and easy to resolve by the usage of TM.

## 206 **Perceived causes**

207 When it came to perceived causes of sore throat, most participants were unable to identify a  
208 causative agent for sore throat. The most widely discussed transmission model was based  
209 around the custom of members of the same compound eating with their hands from the same  
210 plate. The sore throat transmission event would specifically and consistently depend on the  
211 eaters' hygiene-related practices after a meal-sharing event. There were variations regarding  
212 the specific hygiene-related acts identified as transmission triggers, the most common one was  
213 not washing your hands and “rubbing” them on the compound’s “wall” or “fence”.

214 *“When you eat [as a] family you eat from one bowl. When you wash*  
215 *your hand here after that you make your hand like this on the sides of*  
216 *the bucket, the top part. So after that, the people you [ate] with , [...]*

217 *our belief [is ...] some will have this thing [sore throat]” (P016,*  
218 *mother).*

219 *“If you eat with people in the same bowl and just wash your hand and*  
220 *wipe it on the fence or something then that can also cause sore throat”*  
221 *(P012, older sister).*

222 Some participants also identified ingesting specific foods such as spicy chili peppers or palm  
223 oil as having the capacity to cause sore throat (in both adults and children) as well as smoking  
224 (adults only).

## 225 **Healthcare workers perceptions**

226 The causes of sore throat, as reported by healthcare workers, were attributed to a viral or a  
227 bacterial infection. According to the pharmacist, transmission events were associated with  
228 activities such as gatherings, eating and drinking with other people and “saying lots of things”  
229 (aerosols that caused person-to-person transmission). One of the nurses said sore throat  
230 infections were caused by improper food handling (not washing or peeling the food).

231 In terms of identification, healthcare workers indicated that a visual inspection for “tonsil  
232 swollen” was used to differentiate between “pharyngitis or tonsillitis”, which in this context  
233 referred to irritated throat caused by a viral infection or tonsils with exudates caused by a  
234 bacterial infection. The pharmacist mentioned that if exudates were present, he would dispense  
235 Penicillin B (250mg) and Ibuprofen to customers. However, he expressed concerns about the  
236 limited resources available to conduct specific diagnostic tests, which would help avoid the  
237 unnecessary use of broad-spectrum antibiotics.

238 Nurses and other healthcare workers' knowledge regarding ARF and RHD causes,  
239 identification and management were limited. When initially probed, none mentioned ARF or

240 RHD as sequelae related to sore throats. When specifically asked about ARF and RHD, one of  
241 the nurses said ARF involved high fever and incidence followed a seasonal pattern “just like  
242 malaria”. He acknowledged lots of heart problems among children under five, with RHD being  
243 a disease that started in 2020 and that could be diagnosed by using a heart scan. Another nurse  
244 said that paediatricians and cardiologists do know about the condition, but it is “briefly  
245 explained by external speakers” during nursing studies.

## 246 **Health-seeking behaviour and care practices**

247 A sore throat management episode would typically begin with the child experiencing it  
248 complaining to the primary caregiver (normally a mother or older sister) regarding their  
249 experience of throat pain that is hampering their food or drink intake. After the caregiver  
250 identified the situation as a sore throat episode, they would initiate actions to manage the  
251 symptoms to resolve the episode. Biomedical and traditional approaches to healthcare were  
252 often viewed as complementary.

253 The most frequently narrated treatment itinerary corresponded to initial use of traditional  
254 remedies at home followed by health seeking at a pharmacy or health facility if home  
255 remedies did not treat the symptoms, e.g.,:

256 *“we take black pepper, put it in hot water, and put it in the neck [throat].*  
257 *But sometimes it doesn't work, then we go to the hospital.” (P008, mother).*

258 One young woman reported self-managing the condition by combining paracetamol with a  
259 *safou*, an amulet crafted by a *marabout*. Other participants indicated they never seek facility-  
260 based healthcare for a sore throat due to the perceived effectiveness of traditional remedies in  
261 solving recurrent sore throat episodes.

262 *“I use hot water, use it two days, it stop, all gone, so she also I did*  
263 *that [...] only hot water in two days, it stays and three days then it*  
264 *stop” (P007, mother).*

265 Within households, participants typically identified fathers as the one responsible for covering  
266 the healthcare-related expenditures, mothers and older sisters were commonly identified as

267 chaperones to access the biomedical sector, and parents were most often identified as decision  
268 makers.

## 269 **Traditional medicine use**

270 The most common reported home remedy consisted of mixing black pepper (*Piper nigrum*)  
271 powder in hot water, which had to be drunk or gargled up to three times a day. Licking cooking  
272 mortars that had been used to grind black pepper and ginger was also described, as was using  
273 a teaspoon covered in black pepper to either straighten the inflamed uvula (after it “collapses”)  
274 to elicit the gagging reflex in the child. The latter was used to help exudate “come out”.

275 For babies and young children, the *marabout* described reciting a spell and massaging the  
276 child’s neck area where “the pain is”. For older children and adults, he reported making a paste  
277 of black pepper, salt, and leaves from the mango (*Mangifera indica*) or *Gro* trees, and putting  
278 the mixture on the tongue of the patient while they inhaled steam from a bowl of hot water  
279 under a blanket. This combination was used until “the exudates” come out.

280 Informal conversations suggested that some people go to the market to buy herbs to treat sore  
281 throats. During a visit to a Serrekunda market herbal stand, the herbalist recommended buying  
282 a sachet containing *Banah* tree leaves powder. The *marabout* also acknowledged *Banah* had  
283 curative properties for sore throat but used mango leaves more often because they were easier  
284 to find. The pharmacist reported that such traditional medicines could have negative effects on  
285 the kidneys and the liver due to their bitterness and unknown doses being taken.

286 Another treatment for sore throat mentioned by a few people involved spitting over the fence  
287 or wall delimitating your compound into a compound in which you had never eaten before.  
288 Only one nurse tried to provide a causal explanation for this, suggesting that the regurgitation  
289 that predeceases the spitting act would help to remove the exudates from the tonsils.

## 290 **Biomedicine use**

291 Following a consultation at formal healthcare facilities individuals would either receive  
292 treatment or a prescription to be taken to the pharmacy. Some participants referred to using  
293 antibiotics as superior, faster, or more appropriate for the sore throat condition. The pharmacy  
294 worker expressed concerns about antibiotic resistance and some caregiver accounts suggested  
295 they stopped giving antibiotics when symptoms resolved: “*Before those medicines finish, then*  
296 *the sore throat goes away. She did not take medicine again* [continue the medicine after the  
297 symptoms decreased]” (P011, mother).

## 298 **Changing societal practices**

299 Despite the contemporaneous usage and compatibility of traditional and biomedicine, some  
300 changing patterns were reported. The most common practice change concerned the declining  
301 use of teaspoons covered in black pepper, usually executed by the elderly of the compound.  
302 This change was attributed to the discomfort elucidated by the method, compared with the  
303 simplicity of administration and perceived effectiveness of antibiotics. Another perceived  
304 cause for the subtle transition towards the preference of the biomedical sector is the death of  
305 *marabouts* with no apprentices to replace them. The practice of lymphadenectomy was also  
306 reported to be a procedure executed by *marabouts* in the past to cure and prevent future  
307 episodes of sore throats or “madness” caused by sleeping sickness which has been eliminated  
308 from this part of West Africa.

## 309 **Perceived barriers to the biomedical sector**

310 Although the overall perception of the biomedical sector was positive, several barriers were  
311 identified.

312 A repeatedly identified barrier in this study were the perceived direct and indirect costs  
313 involved in seeking healthcare in the biomedical sector. Participants described having to leave  
314 their “duties” and “chores” to go to the centre, implying loss of income (indirect cost), waiting  
315 for long hours to be seen by a health worker and then being deceived when treatment was  
316 needed but not available at the same facility, meaning they had to approach a pharmacy and  
317 pay for the treatment out-of-pocket (direct cost):

318 *“Sometimes you leave everything, go with the sick there, from morning*  
319 *you’ll be in the queue until afternoon, then they will just tell you there*  
320 *is no medicine left, so you go and buy to the pharmacy, so then if you*  
321 *are there without money, how are you going to buy those medicine?”*  
322 (P011, mother).

323 Some participants described delaying antibiotic treatment due to the need of obtaining the  
324 necessary resources to be able to buy them. The additional burden of having to go to the  
325 pharmacy after reaching the health centre was such that one participant acknowledged never  
326 using a prescription given at the health centre because of the successful resolution of her sore  
327 throat after using TM.

328 When participants perceived they had insufficient time to visit a health centre on the day of  
329 illness, they sometimes reported directly attending pharmacies for investigation (“checkings”)  
330 and treatment, despite increased associated costs.

331 Another repeatedly expressed complaint was that health care workers were perceived to have  
332 a neglectful attitude towards the patients, regardless of the severity of their conditions:

333 *“Sometimes these health centres, you can go there, then you see nurses*  
334 *there then they would refuse to attend you, they would be doing some*



335 *other things. Sometimes you see a patient who is about to die and they*  
336 *will just be careless until the person die” (P006, father).*

## 337 **Discussion**

338 Our study provides the first assessment of beliefs about causation and care seeking behaviour  
339 for sore throat in West Africa. We identified that, in any household, sore throat is typically  
340 perceived to affect one individual, disproportionately or exclusively. Most cases of sore throat  
341 are initially managed at home using traditional medicine, with remedies consisting mainly or  
342 black pepper and water or water vapour, though healers also sometimes make a paste from  
343 local tree leaves. Only if this is ineffective is care sought through the formal health system,  
344 with most people describing receiving antibiotics. Sore throats are rarely perceived as life-  
345 threatening, and awareness of the link between sore throats and ARF or RHD was not reported  
346 in this study population.

347 To the best of our knowledge, this is the first in-depth analysis of a community’s understanding  
348 and health-seeking behaviour related to sore throats in The Gambia. In this study, individuals  
349 identified as suffering recurrent sore throat episodes were most commonly 5 to 14 years of age,  
350 consistent with the group described as suffering the highest burden of sore throat, ARF and  
351 RHD.<sup>6</sup> Our results confirm findings from previous studies suggesting that most community  
352 members, and many healthcare workers, were unaware of the link between sore throats, ARF,  
353 and RHD and that many thought traditional remedies were appropriate to treat or manage sore  
354 throats, prior to resorting to antibiotics.<sup>16,18,22,23</sup> Based on a recent review, in settings with a  
355 high risk of ARF and where point-of-care diagnostics is not available, it is recommended that  
356 all patients with acute sore throats receive antibiotics.<sup>24</sup> Despite the low levels of knowledge  
357 concerning the cause and transmission of sore throats, we identified key barriers to seeking  
358 healthcare through the formal system. Both direct and indirect costs represent a significant

359 barrier to care seeking. Whilst we did not identify evidence of catastrophic expenditure, it was  
360 clear that cost issues may delay health care seeking, increasing the possibilities of unresolved,  
361 persistent underlying infections that can lead to ARF and RHD.

362 Only two studies have previously conducted in-depth interviews or group discussions to  
363 understand the community's perspective surrounding sore throat beliefs and treatment  
364 practices. Consistent with our findings, perceptions of sore throats and health-related  
365 behaviours described in those studies differed markedly from the biomedical theoretical model,  
366 with important population proportions relying upon TM use.<sup>18,17</sup> In our current study some  
367 traditional remedies, such as spitting or coughing up exudates, involve actions that could  
368 actively promote the transmission of StrepA to other household members or neighbours; others  
369 such as the application of pepper and steam seem less harmful. The safety and efficacy of all  
370 of these practices could be discussed in future community engagement strategies.

371 Several important limitations were identified in this study. Language, gender, and cultural  
372 differences between participants and members of the research team might have affected  
373 experiences elicited due to positionality and social desirability. To address this, we worked  
374 closely with trained nurses and fieldworkers who came from the communities where the  
375 research took place and had 'insider' knowledge of local health discourses and traditional  
376 practices. However, working with a team of healthcare workers could have promoted social  
377 desirability bias and motivated participants to over-report biomedical sector services use. Most  
378 of the study participants were also enrolled in our SpyCATS cohort study. This is particularly  
379 relevant for the health-seeking behaviours described by the participants in the study. It is  
380 plausible that those who agreed to participate in the cohort study could contribute to a healthy  
381 participant effect, that is overall more concerned about their health status and is not necessarily  
382 representative of the whole Gambian population. The participants all lived in a single urban

383 area in The Gambia and our findings might not represent the pluralistic culture of different  
384 Gambian regions.

## 385 **Conclusions**

386 This is the first study to provide data on healthcare-seeking behaviours and beliefs surrounding  
387 sore throats of caregivers of children in the Gambia. Participants' knowledge regarding causes  
388 and consequences of sore throats was low and did not necessarily prompt active healthcare  
389 seeking behaviours to the health facility nor lead a household to adopt hygiene practices that  
390 could halt asymptomatic transmission when one child tends to be sick. The findings from this  
391 study, in conjunction with the SpyCATS epidemiological outcomes, will provide a multi-  
392 disciplinary foundation for developing comprehensive interventions combining information,  
393 education, and communication strategies that, with improvements in the health system, could  
394 help prevent StrepA-related sequelae in the Gambian context.

## 395 **Acknowledgements**

396 We are grateful of the following members of the MRCG Strep A Study Group whose names  
397 are not in the main authorship list: Annette Erhart, Pierre R. Smeesters, Martin Antonio, Sona  
398 Jabang, Beate Kampmann, Anna Roca, Isatou Jagne Cox, Peggy-Estelle Tiencheu, and Grant  
399 Mackenzie. We thank the MRCG at LSHTM and study participants and the families of Sukuta  
400 for their involvement and interest in the study. We also thank Professor Koen Peteers (Institute  
401 of Tropical Medicine Antwerp) for meeting and providing MSS with theoretical resources  
402 during the study design. We also thank Franca for the generation of the first draft of the CARE  
403 form. MSS also thanks the LSHTM Trust Fund for their contribution to plane tickets to and  
404 from The Gambia.

## 405 **Funding**

406 TIdS is supported by a Wellcome Trust Intermediate Clinical Fellowship (110058/Z/15/Z).  
407 EPA is supported by a Wellcome Trust Clinical Ph.D. fellowship in Global Health  
408 (222927/Z/21/Z). GdC is supported by an FNRS doctoral fellowship (ref:ASP/A622).

## 409 **Authorship contribution**

410 MSS: study design, methodology, data collection, data analysis, data interpretation, writing-  
411 original draft and editing. MMar: study conceptualization and design, supervision, resources,  
412 writing-review, editing. EPA: study conceptualization and design, supervision, coordination,  
413 writing-review and editing. JP: study design, methodology, supervision, writing-review, and  
414 editing. GC: coordination, supervision, writing-review and editing. MMan: data collection,  
415 translation, writing-review. AB: data collection, translation, writing-review. IC: data collection  
416 support, translation, writing-review. TIdS: study conceptualization, resources, writing-review  
417 and editing. AJK: writing-review and editing. All authors read and approved the final  
418 manuscript.

## 419 **Conflict of interest**

420 The authors declare they have no competing interests.

## 421 **References**

- 422 1. Alouf JE, Müller-Alouf H. Streptococcus Group A. Encyclopedia of Medical  
423 Genomics and Proteomics. 2022 May 22;1241–5.
- 424 2. Group A Streptococcal (GAS) Disease | CDC [Internet]. [cited 2022 Sep 1]. Available  
425 from: <https://www.cdc.gov/groupastrep/index.html>
- 426 3. Impetigo: Information For Clinicians | CDC [Internet]. [cited 2022 Sep 1]. Available  
427 from: <https://www.cdc.gov/groupastrep/diseases-hcp/impetigo.html>
- 428 4. Barth DD, Daw J, Xu R, Enkel S, Pickering J, McRae T, et al. Modes of transmission  
429 and attack rates of group A Streptococcal infection: a protocol for a systematic review  
430 and meta-analysis. Syst Rev. 2021 Dec 1;10(1).
- 431 5. Heymann DL. Control of Communicable Diseases Manual. 19th Editi. Control of  
432 Communicable Diseases Manual. Washington, DC: American Public Health  
433 Association; 2008.

- 434 6. Watkins DA, Johnson CO, Colquhoun SM, Karthikeyan G, Beaton A, Bukhman G, et  
435 al. Global, Regional, and National Burden of Rheumatic Heart Disease, 1990–2015.  
436 *New England Journal of Medicine*. 2017 Aug 24;377(8):713–22.
- 437 7. World Health Organization. Rheumatic Heart Disease [Internet]. [cited 2022 Sep 1].  
438 Available from: [https://www.who.int/news-room/fact-sheets/detail/rheumatic-heart-](https://www.who.int/news-room/fact-sheets/detail/rheumatic-heart-disease)  
439 [disease](https://www.who.int/news-room/fact-sheets/detail/rheumatic-heart-disease)
- 440 8. Ellis NMJ, Li Y, Hildebrand W, Fischetti VA, Cunningham MW. T cell mimicry and  
441 epitope specificity of cross-reactive T cell clones from rheumatic heart disease. *J*  
442 *Immunol*. 2005 Oct 15;175(8):5448–56.
- 443 9. Majmundar VD, Nagalli S. Erythema Marginatum. *StatPearls*. 2022 Jul 4;
- 444 10. Sydenham Chorea | National Institute of Neurological Disorders and Stroke [Internet].  
445 [cited 2022 Sep 1]. Available from: [https://www.ninds.nih.gov/health-](https://www.ninds.nih.gov/health-information/disorders/sydenham-chorea)  
446 [information/disorders/sydenham-chorea](https://www.ninds.nih.gov/health-information/disorders/sydenham-chorea)
- 447 11. Carapetis JR, Beaton A, Cunningham MW, Guilherme L, Karthikeyan G, Mayosi BM,  
448 et al. Acute rheumatic fever and rheumatic heart disease. *Nat Rev Dis Primers*. 2016  
449 Jan 14;2.
- 450 12. Carapetis JR, Steer AC, Mulholland EK, Weber M. The global burden of group A  
451 streptococcal diseases. *Lancet Infect Dis*. 2005 Nov 1;5(11):685–94.
- 452 13. (IHME) I for HM and E. GBD 2019 Cause and Risk Summary: Rheumatic heart  
453 disease. Seattle, USA; 2020.
- 454 14. Barth DD, Moloi A, Mayosi BM, Engel ME. Prevalence of group A Streptococcal  
455 infection in Africa to inform GAS vaccines for rheumatic heart disease: A systematic  
456 review and meta-analysis. *Int J Cardiol*. 2020 May 15;307:200–8.
- 457 15. Shulman ST, Bisno AL, Clegg HW, Gerber MA, Kaplan EL, Lee G, et al. Clinical  
458 practice guideline for the diagnosis and management of group A streptococcal  
459 pharyngitis: 2012 update by the Infectious Diseases Society of America. *Clin Infect*  
460 *Dis*. 2012 Nov;55(10).
- 461 16. Jaiteh LES, Drammeh L, Anderson ST, Mendy J, Ceesay S, D’Alessandro U, et al.  
462 Rheumatic heart disease in The Gambia: clinical and valvular aspects at presentation  
463 and evolution under penicillin prophylaxis. *BMC Cardiovasc Disord*. 2021 Dec  
464 1;21(1).
- 465 17. Nalubwama H, Ndagire E, Sarnacki R, Atala J, Beaton A, Kansime R, et al.  
466 Community Perspectives on Primary Prevention of Rheumatic Heart Disease in  
467 Uganda. *Glob Heart*. 2022;17(1).
- 468 18. Stein E, Pulle J, Zimmerman M, Otim I, Atala J, Rwebembera J, et al. Previous  
469 Traditional Medicine Use for Sore Throat among Children Evaluated for Rheumatic  
470 Fever in Northern Uganda. *Am J Trop Med Hyg*. 2020 Dec 14;104(3):842–7.
- 471 19. The Gambia Bureau of Statistics. Distribution of Population by Gender and LGA -  
472 GBoS [Internet]. 2016 [cited 2022 Sep 2]. Available from:  
473 [https://www.gbosdata.org/topics/population-and-demography/distribution-of-](https://www.gbosdata.org/topics/population-and-demography/distribution-of-population-by-gender-and-lga)  
474 [population-by-gender-and-lga](https://www.gbosdata.org/topics/population-and-demography/distribution-of-population-by-gender-and-lga)
- 475 20. Guest G, Namey E, Chen M. A simple method to assess and report thematic saturation  
476 in qualitative research. *PLoS One*. 2020 May 1;15(5).
- 477 21. Tong A, Sainsbury P, Craig J. Consolidated criteria for reporting qualitative research  
478 (COREQ): a 32-item checklist for interviews and focus groups. *International Journal*  
479 *for Quality in Health Care*. 2007 Dec 1;19(6):349–57.
- 480 22. Nkoke C, Luchuo EB, Jingi AM, Makoge C, Hamadou B, Dzudie A. Rheumatic heart  
481 disease awareness in the South West region of Cameroon: A hospital based survey in a  
482 Sub-Saharan African setting. *PLoS One*. 2018 Sep 1;13(9).

- 483 23. Hailu A, Tsega T, Gebregziabher T, Temesgen H, Tesfay H, Kahsay H, et al.  
484 Community awareness of sore throat and rheumatic heart disease in northern Ethiopia.  
485 Preprint. 2020;1–35.
- 486 24. Gunnarsson RK, Ebell M, Centor R, Little P, Verheij T, Lindbæk M, et al. Best  
487 management of patients with an acute sore throat—a critical analysis of current  
488 evidence and a consensus of experts from different countries and traditions. *Infect Dis.*  
489 2023;  
490
